# Supplementary material
Source: PubMed Central journal article supplement (PMC1383722)

### Liu et al. Supplementary Figure 1

**HTPI has low run-to-run variability.** Pooled naïve hippocampus samples were run in triplicate (1 mg protein loaded per blot). Images of developed blots (Template A) were shown from top to bottom. Each template has 39 usable lanes for antibody probing and the last lane (40) was probed with “molecular weight markers-antibodies” (their MW is illustrated on the right margins). Lane numbers were indicated over the top margin. Each lane is separated and probed with 4-7 monoclonal antibodies. With the use of the manifold partition system, there is no lane-to lane primary antibody cross-contamination. The results confirm the low variability in banding pattern with same sample analysis.

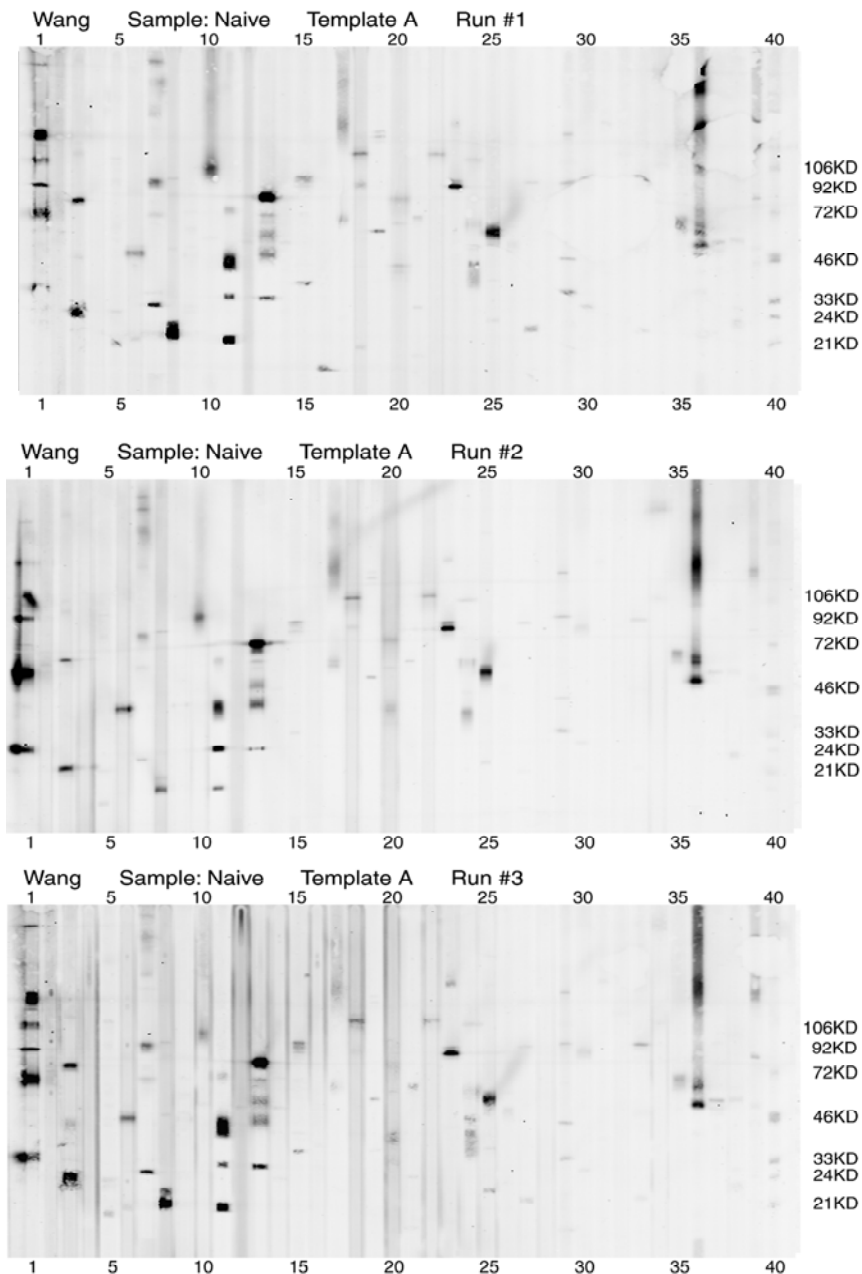

## Liu et al. Supplementary Figure 2

**Comparison of Template B from Naïve, TBI, calpain-2 and caspase-3 digestion.** Template B for naïve hippocampus (upper left) was compared to that of calpain-2 (upper right) and caspase-3 digestion (lower left) and TBI (lower right). Molecular weight markers (lane 40) are as indicated on the right. Proteins reduced in average intensity are potentially proteolytic targets for calpain and caspase-3 or down-regulated in the case of TBI (in solid box). Two proteins found to be up-regulated in TBI were ceruloplasmin (B37) and alpha-actinin (B9) (in dotted box). In addition, several BDPs produced by calpain-2 or caspase-3 can be readily observed (in dotted box).

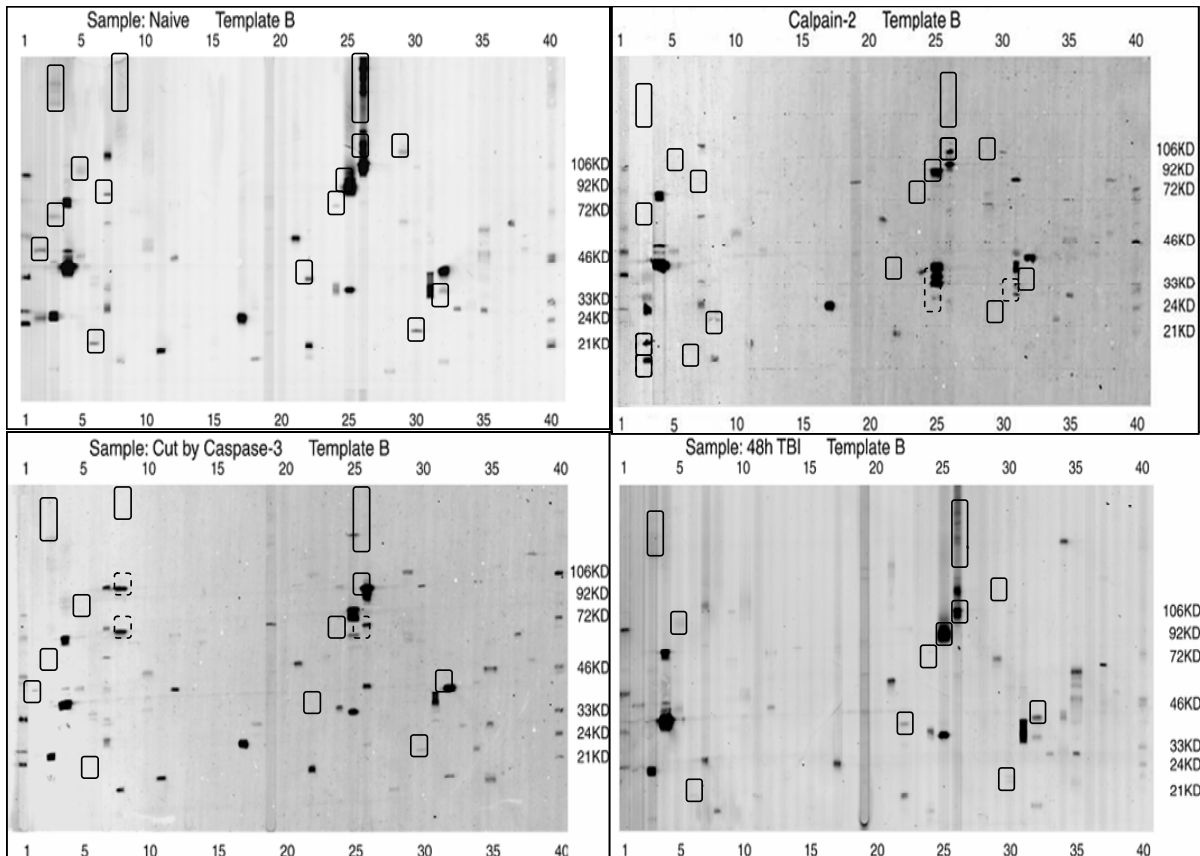

Supplement: bj3940715add.pdf [file bj3940715add.pdf]
